# Supplementary material for: Efficacy of durvalumab plus chemotherapy in advanced biliary duct cancer and biomarkers exploration
Source: PubMed Central journal article supplement — Cancer Immunol Immunother. 2024 Sep 5;73(11):220. doi: 10.1007/s00262-024-03796-1 (PMC11377375; doi:10.1007/s00262-024-03796-1), 2024-09-05
Supplement: 262_2024_3796_MOESM1_ESM.pdf [file 262_2024_3796_MOESM1_ESM.pdf]

# Supplementary Figure 1

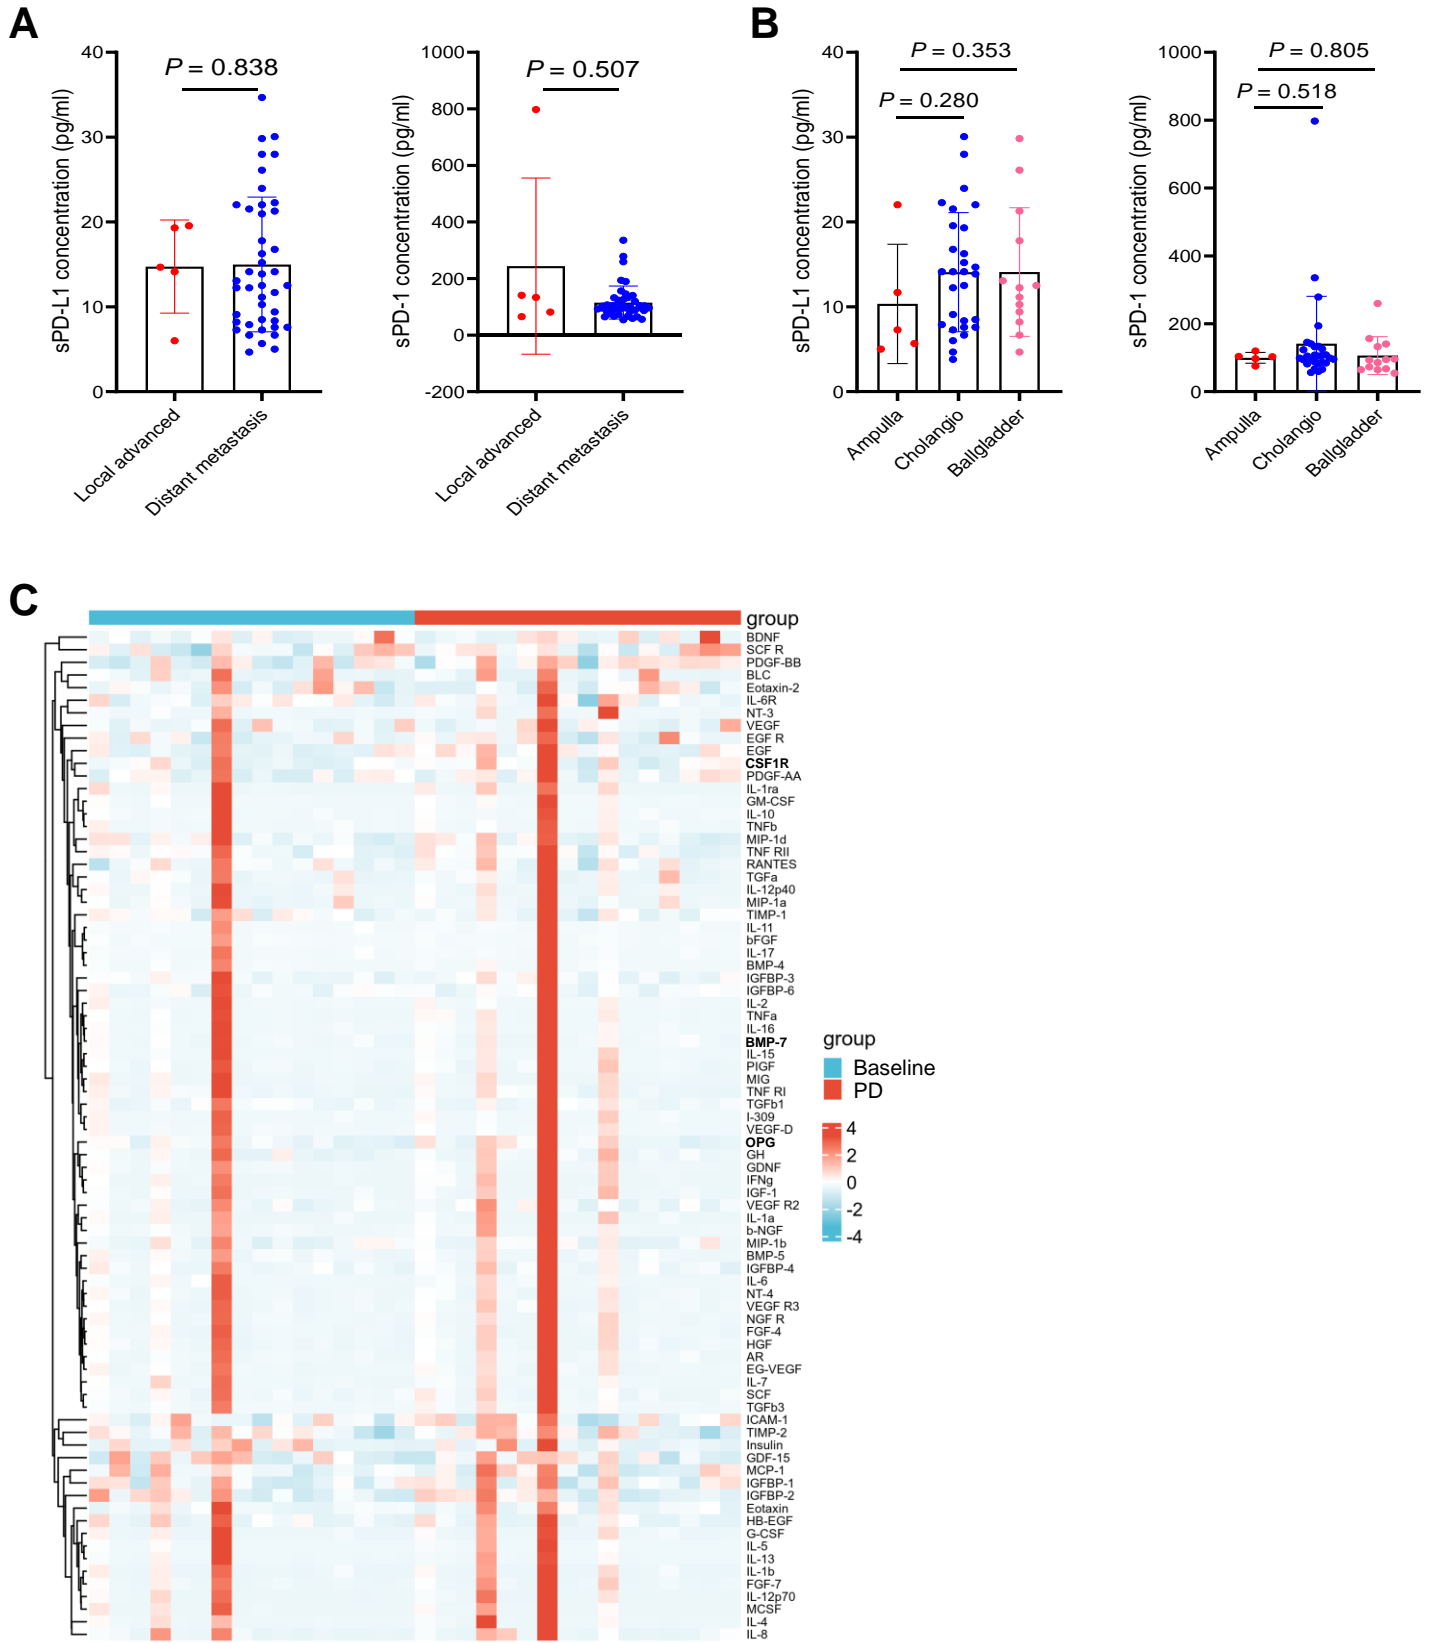

## Supplementary Figure 2

**A**

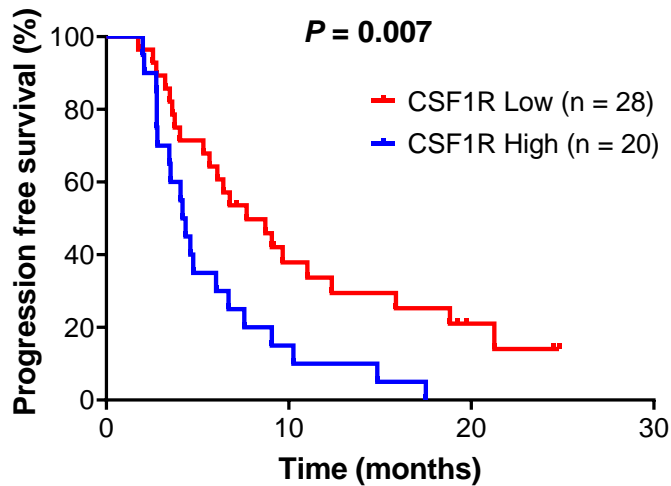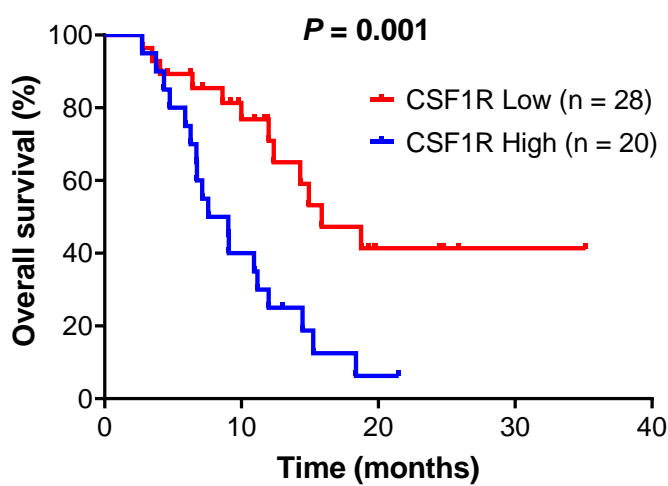

**B**

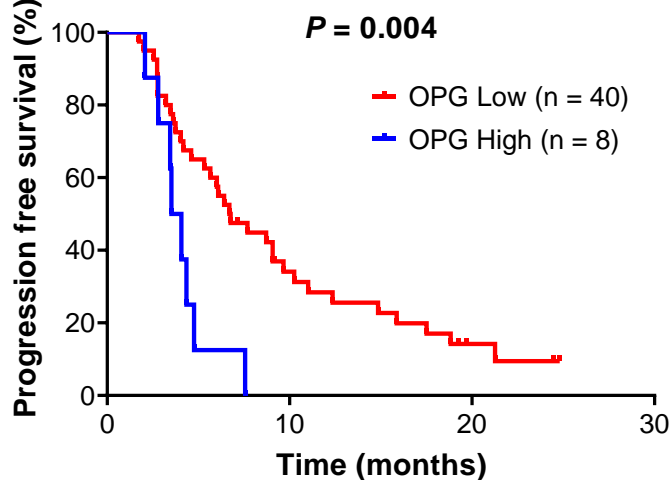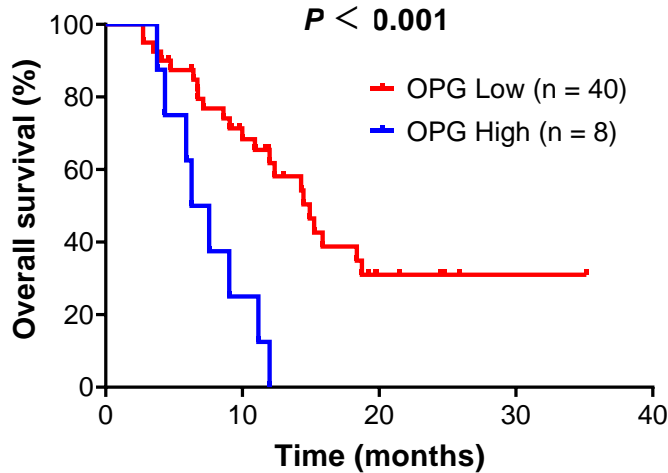

**C**

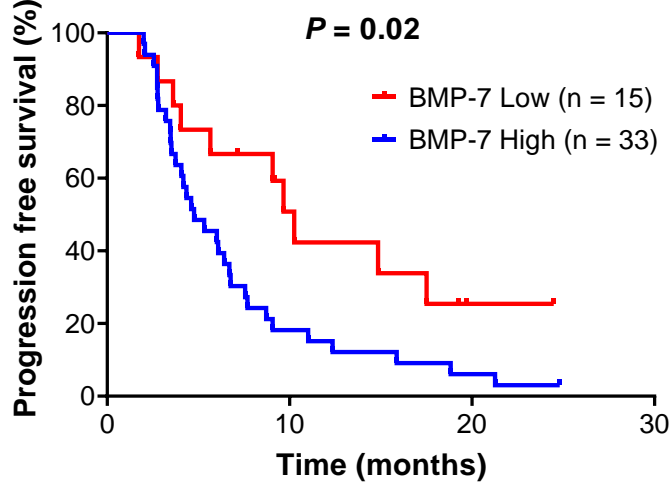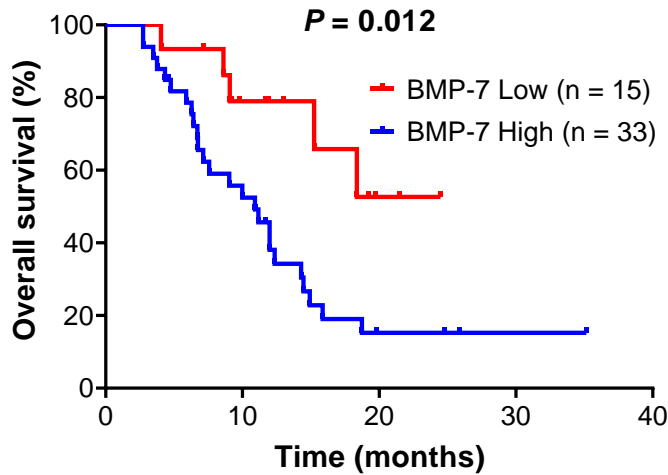

# Supplementary Figure 3

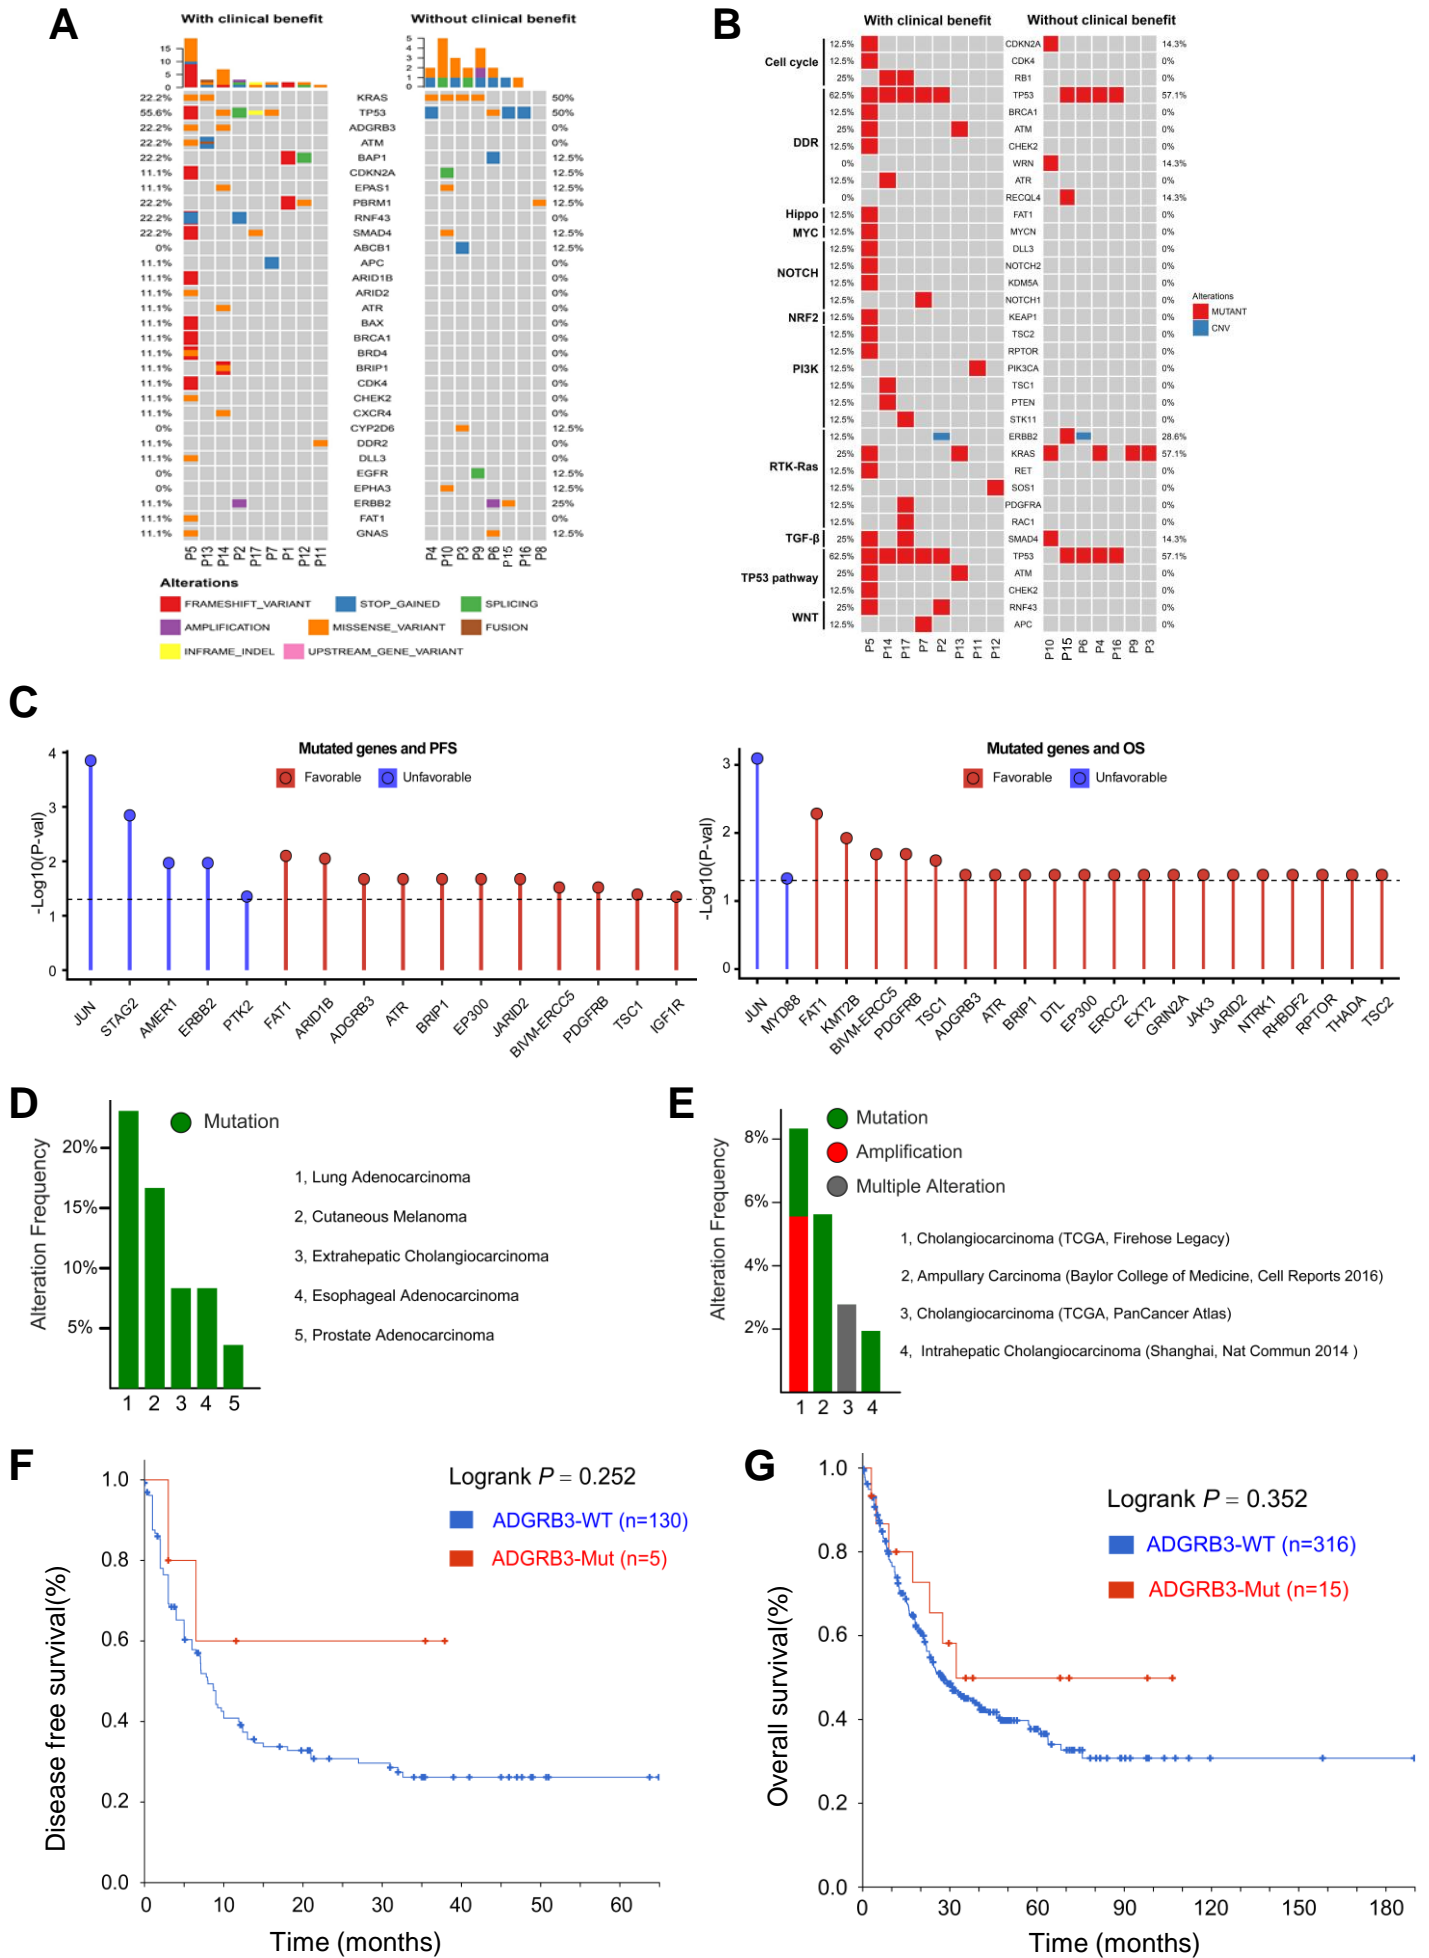

## Supplementary Figure 4

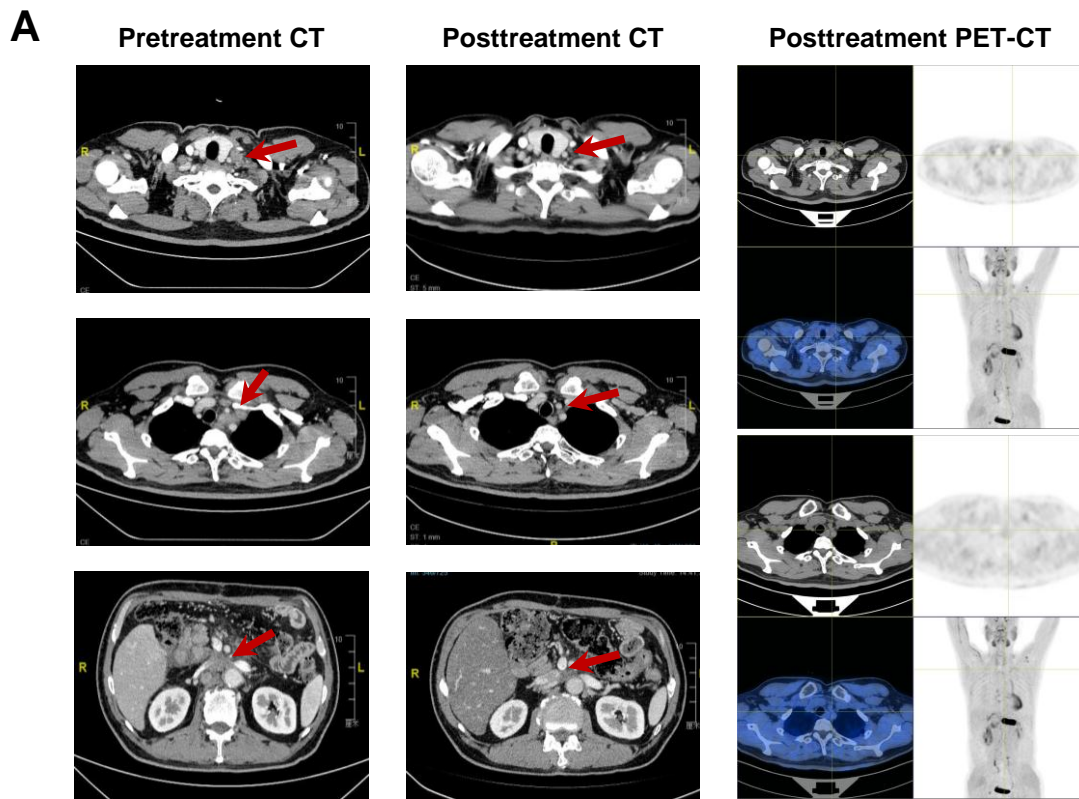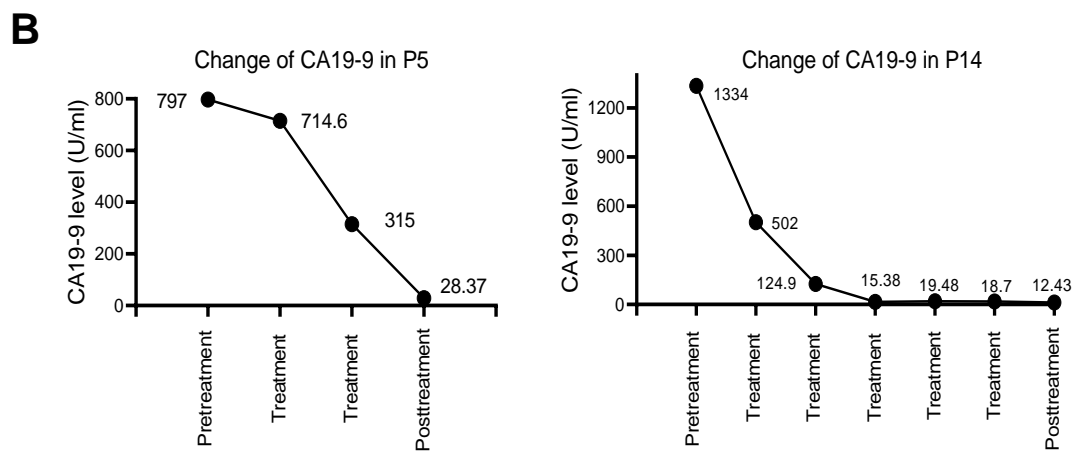

# Supplementary Figure 5

**A**

## ADGRB3

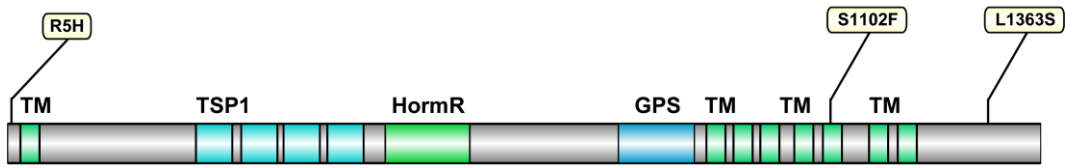

**B**

| ID  | Gene   | Amino acid change | ExonicFunc         | OncoKB   | Polyphen2 |
|-----|--------|-------------------|--------------------|----------|-----------|
| P2  | RNF43  | p.R371*           | stop_gained        | Damaging |           |
| P5  | RNF43  | p.R117Afs*41      | frameshift_variant | Damaging |           |
| P5  | RNF43  | p.G659Vfs*41      | frameshift_variant | Damaging |           |
| P5  | RNF43  | p.R371*           | stop_gained        | Damaging |           |
| P5  | ADGRB3 | p.L1363S          | missense_variant   |          | Damaging  |
| P5  | ADGRB3 | p.R5H             | missense_variant   |          | Damaging  |
| P14 | ADGRB3 | p.S1102F          | missense_variant   |          | Damaging  |

**C**

## RNF43

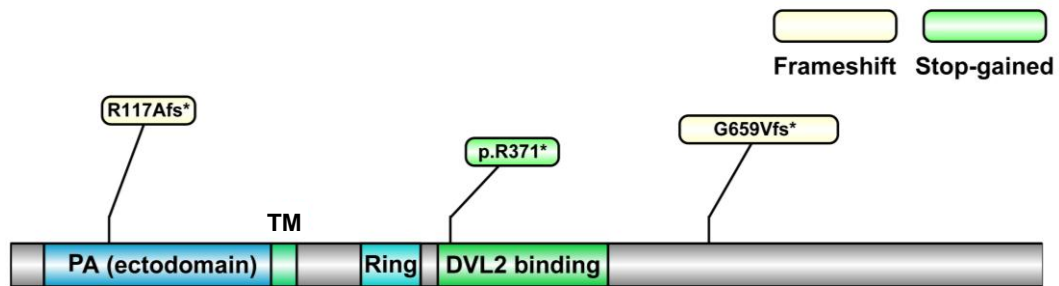

**D**

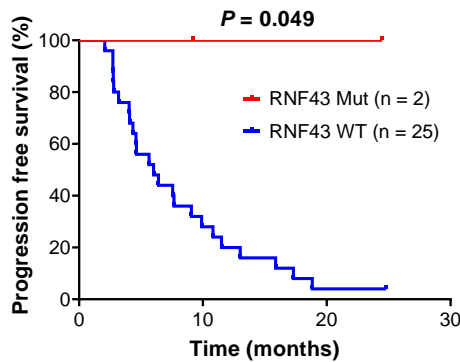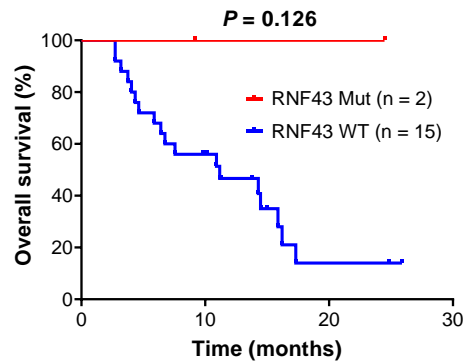

**E**

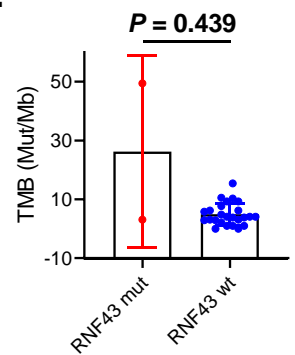

**F**

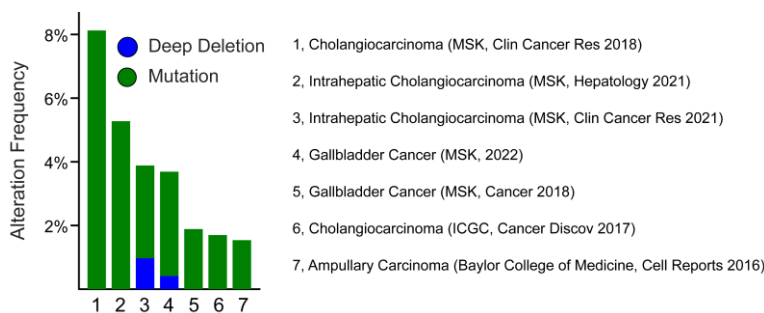

**G**

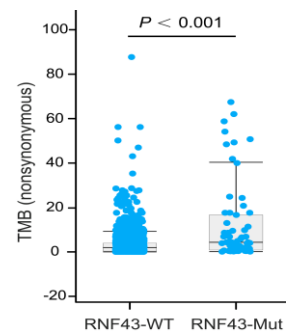

1 **Supplementary Figure legends**

2 **Figure S1. Associations of sPD-L1 and sPD-1 with tumor stage and**  
3 **location.** Associations of sPD-L1 and sPD-1 with disease stage (A) and  
4 tumor location (B). (C) Relative levels of detected cytokines in paired  
5 blood samples collected at baseline and the disease progression time point.  
6 ABC, advanced biliary tract cancer; sPD-L1, soluble programmed death  
7 ligand 1; sPD-1, soluble programmed death 1.

8

9 **Figure S2. Survival prediction of CSF1R, OPG and BMP-7.** PFS and  
10 OS in ABC patients receiving chemotherapy with durvalumab according  
11 to relative levels of CSF1R (A), OPG (B) and BMP-7 (C).

12 PFS, progression free survival; OS, overall survival; ABC, advanced  
13 biliary tract cancer; CSF1R, colony-stimulating factor 1 receptor; OPG,  
14 osteoprotegerin; BMP-7; bone morphogenetic protein 7.

15

16 **Figure S3. Pathway analysis and ADGRB3 mutations in the cBioPortal**  
17 **database.** (A) Waterfall plots showing the frequency and types of top  
18 mutated genes found in 17 ABC patients underwent target sequencing of  
19 437 cancer related genes who did or did not benefit from durvalumab. (B)  
20 Pathway enrichment ABC patients who did or did not benefit from  
21 durvalumab. (C) Mutated genes associated with PFS and OS in our cohort.  
22 Mutation frequency of ADGRB3 in solid tumors (D) and

23 cholangiocarcinoma (E) from the cBioPortal database. Disease free  
24 survival (DFS) (F) and OS (G) in ABC patients with or without ADGRB3  
25 mutations in the cBioPortal database.

26 ABC, advanced biliary tract cancer; ADGRB3, adhesion G protein coupled  
27 receptor B3; PFS, progression free survival; OS, overall survival; DFS,  
28 disease free survival.

29

30 **Figure S4. Clinical response of patients P5 and P14 to durvalumab.** (A)

31 Pre- and posttreatment CT scans as well as PET/CT images of patient P14.

32 (B) Pre- and posttreatment CA19-9 levels in patients P5 and P14.

33

34 **Figure S5. Clinical associations of ADGRB3 and RNF43 mutations.** (A)

35 Schematic illustration of ADGRB3 mutations detected in our samples. (B)

36 Summary of ADGRB3 and RNF43 mutations. (C) Schematic illustration

37 of RNF43 mutations detected in our samples. (D) PFS and OS of RNF43

38 Mut and WT patients treated with chemotherapy plus durvalumab. (E)

39 TMB degree of RNF43-mutated and WT patients. (F) Mutation frequency

40 of RNF43 in cholangiocarcinoma from the cBioPortal database. (G) TMB

41 in cholangiocarcinoma patients with or without the RNF43 mutation from

42 the cBioPortal database.

43 ADGRB3, adhesion G protein coupled receptor B3; RNF43, Ring Finger

44 Protein 43; TM, transmembrane region; TSP1, thrombospondin type 1

45 repeats; HormR, domain present in hormone receptors; GPS, G-protein-  
46 coupled receptor proteolytic site domain; Mut, mutation; WT, wild type.



**Supplementary Table 1. Uni and multivariate cox analysis of different clinical pathological indices with PFS in patients receiving durvalumab**

| Characteristics        | Total<br>(N) | Univariate analysis   |                | Multivariate analysis |                |
|------------------------|--------------|-----------------------|----------------|-----------------------|----------------|
|                        |              | Hazard ratio (95% CI) | <i>P</i> value | Hazard ratio (95% CI) | <i>P</i> value |
| <b>Age</b>             | 93           | 0.10 (0.97 - 1.02)    | 0.626          |                       |                |
| <b>Sex</b>             | 93           |                       |                |                       |                |
| Male                   | 51           | Reference             |                |                       |                |
| Female                 | 42           | 1.24 (0.80 - 1.92)    | 0.344          |                       |                |
| <b>Differentiation</b> | 93           |                       |                |                       |                |
| Poor                   | 52           | Reference             |                |                       |                |
| High or intermediate   | 41           | 0.68 (0.44 - 1.06)    | 0.087          |                       |                |
| <b>Disease stage</b>   | 93           |                       |                |                       |                |
| Locally advanced       | 11           | Reference             |                |                       |                |
| Distant metastasis     | 82           | 1.92 (0.88 - 4.18)    | 0.099          |                       |                |
| <b>Primary site</b>    | 93           |                       |                |                       |                |

| Characteristics                       | Total<br>(N) | Univariate analysis   |         | Multivariate analysis |         |
|---------------------------------------|--------------|-----------------------|---------|-----------------------|---------|
|                                       |              | Hazard ratio (95% CI) | P value | Hazard ratio (95% CI) | P value |
| Intrahepatic                          | 43           | Reference             |         |                       |         |
| Gallbladder                           | 27           | 0.96 (0.57 - 1.61)    | 0.868   |                       |         |
| Extrahepatic                          | 14           | 1.18 (0.62 - 2.23)    | 0.614   |                       |         |
| Ampulla                               | 9            | 0.92 (0.40 - 2.11)    | 0.846   |                       |         |
| <b>Liver metastasis</b>               | 93           |                       |         |                       |         |
| Present                               | 59           | Reference             |         |                       |         |
| Absent                                | 34           | 0.68 (0.42 - 1.08)    | 0.102   |                       |         |
| <b>Prior surgery of primary tumor</b> | 93           |                       |         |                       |         |
| No surgery                            | 41           | Reference             |         |                       |         |
| Radical surgery                       | 43           | 0.77 (0.48 - 1.22)    | 0.259   |                       |         |
| Palliative surgery                    | 9            | 0.51 (0.23 - 1.16)    | 0.108   |                       |         |
| <b>ECOG</b>                           | 93           |                       |         |                       |         |
| 1                                     | 81           | Reference             |         | Reference             |         |

| Characteristics | Total<br>(N) | Univariate analysis   |                   | Multivariate analysis |                |
|-----------------|--------------|-----------------------|-------------------|-----------------------|----------------|
|                 |              | Hazard ratio (95% CI) | <i>P</i> value    | Hazard ratio (95% CI) | <i>P</i> value |
| 0               | 12           | 0.52 (0.27 - 1.02)    | 0.056             | 0.93 (0.42 - 2.04)    | 0.857          |
| <b>WBC</b>      | 93           | 1.05 (0.97 - 1.12)    | 0.240             |                       |                |
| <b>NLR</b>      | 93           | 1.09 (1.01 - 1.16)    | <b>0.018</b>      | 1.04 (0.94 - 1.15)    | 0.435          |
| <b>Basophil</b> | 93           | 0.00 (0.00 - 0.62)    | <b>0.040</b>      | 0.00 (0.00 - 0.13)    | <b>0.020</b>   |
| <b>PLT</b>      | 93           | 1.00 (1.00 - 1.00)    | 0.777             |                       |                |
| <b>ALP</b>      | 91           | 1.00 (1.00 - 1.00)    | <b>&lt; 0.001</b> | 1.00 (1.00 - 1.01)    | 0.243          |
| <b>GGT</b>      | 91           | 1.00 (1.00 - 1.00)    | <b>0.008</b>      | 1.00 (1.00 - 1.00)    | 0.312          |
| <b>LDH</b>      | 93           | 1.01 (1.00 - 1.01)    | <b>0.003</b>      | 1.00 (1.00 - 1.01)    | 0.204          |
| <b>ALB</b>      | 93           | 0.95 (0.91 - 1.00)    | <b>0.039</b>      | 0.99 (0.92 - 1.06)    | 0.721          |
| <b>CRP</b>      | 93           | 1.01 (1.00 - 1.02)    | <b>0.003</b>      | 1.00 (0.99 - 1.01)    | 0.649          |
| <b>Fbg</b>      | 81           | 1.14 (1.02 - 1.27)    | <b>0.022</b>      | 1.29 (1.07 - 1.55)    | <b>0.008</b>   |
| <b>CA19-9</b>   | 89           | 1.00 (1.00 - 1.00)    | <b>0.020</b>      | 1.00 (1.00 - 1.00)    | <b>0.028</b>   |

The bold *P* values indicate statistically significant.

**Supplementary Table 2. Uni and multivariate cox analysis of different clinical pathological indices with OS in patients receiving durvalumab**

| Characteristics        | Total<br>(N) | Univariate analysis   |                | Multivariate analysis |                |
|------------------------|--------------|-----------------------|----------------|-----------------------|----------------|
|                        |              | Hazard ratio (95% CI) | <i>P</i> value | Hazard ratio (95% CI) | <i>P</i> value |
| <b>Age</b>             | 93           | 1.03 (1.00 - 1.06)    | 0.052          |                       |                |
| <b>Sex</b>             | 93           |                       |                |                       |                |
| Male                   | 51           | Reference             |                |                       |                |
| Female                 | 42           | 0.90 (0.53 - 1.53)    | 0.690          |                       |                |
| <b>Differentiation</b> | 93           |                       |                |                       |                |
| High or intermediate   | 41           | Reference             |                | Reference             |                |
| Poor                   | 52           | 0.58 (0.34 - 1.01)    | 0.052          | 0.56 (0.26 - 1.22)    | 0.145          |
| <b>Disease stage</b>   | 93           |                       |                |                       |                |
| Locally advanced       | 11           | Reference             |                |                       |                |
| Distant metastasis     | 82           | 1.14 (0.49 - 2.67)    | 0.763          |                       |                |
| <b>Primary site</b>    | 93           |                       |                |                       |                |

| Characteristics                       | Total<br>(N) | Univariate analysis   |              | Multivariate analysis |         |
|---------------------------------------|--------------|-----------------------|--------------|-----------------------|---------|
|                                       |              | Hazard ratio (95% CI) | P value      | Hazard ratio (95% CI) | P value |
| Intrahepatic                          | 43           | Reference             |              |                       |         |
| Gallbladder                           | 27           | 0.68 (0.35 - 1.30)    | 0.241        |                       |         |
| Extrahepatic                          | 14           | 0.90 (0.41 - 1.97)    | 0.790        |                       |         |
| Ampulla                               | 9            | 0.71 (0.27 - 1.85)    | 0.483        |                       |         |
| <b>Liver metastasis</b>               | 93           |                       |              |                       |         |
| Present                               | 59           | Reference             |              | Reference             |         |
| Absent                                | 34           | 0.55 (0.30 – 1.00)    | <b>0.048</b> | 0.65 (0.29 - 1.47)    | 0.305   |
| <b>Prior surgery of primary tumor</b> | 93           |                       |              |                       |         |
| No surgery                            | 41           | Reference             |              | Reference             |         |
| Radical surgery                       | 43           | 0.48 (0.27 - 0.85)    | <b>0.012</b> | 0.85 (0.35 - 2.09)    | 0.730   |
| Palliative surgery                    | 9            | 0.41 (0.14 - 1.17)    | 0.095        | 0.60 (0.16 - 2.30)    | 0.456   |
| <b>ECOG</b>                           | 93           |                       |              |                       |         |
| 1                                     | 81           | Reference             |              |                       |         |

| Characteristics | Total<br>(N) | Univariate analysis   |                | Multivariate analysis |                |
|-----------------|--------------|-----------------------|----------------|-----------------------|----------------|
|                 |              | Hazard ratio (95% CI) | <i>P</i> value | Hazard ratio (95% CI) | <i>P</i> value |
| 0               | 12           | 0.51 (0.22 - 1.20)    | 0.124          |                       |                |
| WBC             | 93           | 1.08 (0.99 - 1.17)    | 0.098          |                       |                |
| NLR             | 93           | 1.11 (1.02 - 1.21)    | <b>0.009</b>   | 1.17 (1.01 - 1.35)    | <b>0.040</b>   |
| Basophil        | 93           | 0.05 (0.00 - 136)     | 0.447          |                       |                |
| PLT             | 93           | 1.00 (1.00 - 1.00)    | 0.890          |                       |                |
| ALP             | 91           | 1.00 (1.00 - 1.00)    | <b>0.002</b>   | 1.00 (1.00 - 1.00)    | 0.749          |
| GGT             | 91           | 1.00 (1.00 - 1.00)    | <b>0.006</b>   | 1.00 (1.00 - 1.00)    | 0.902          |
| LDH             | 93           | 1.00 (1.00 - 1.01)    | <b>0.045</b>   | 1.00 (1.00 - 1.01)    | 0.943          |
| ALB             | 93           | 0.93 (0.88 - 0.99)    | <b>0.014</b>   | 0.95 (0.88 - 1.03)    | 0.219          |
| CRP             | 93           | 1.01 (1.00 - 1.02)    | <b>0.005</b>   | 1.00 (0.98 - 1.01)    | 0.557          |
| Fbg             | 81           | 1.18 (1.02 - 1.37)    | <b>0.023</b>   | 1.08 (0.86 - 1.36)    | 0.489          |
| CA199           | 89           | 1.00 (1.00 - 1.00)    | 0.433          |                       |                |

The bold *P* values indicate statistically significant.
